# Supplementary material for: Bone marrow-derived mesenchymal stem cell-secreted IL-8 promotes the angiogenesis and growth of colorectal cancer
Source: PubMed Central journal article supplement (PMC4767474; doi:10.18632/oncotarget.5739), 2015-10-23
Supplement: oncotarget-06-42825-s001.pdf [file oncotarget-06-42825-s001.pdf]

## SUPPLEMENTARY FIGURES

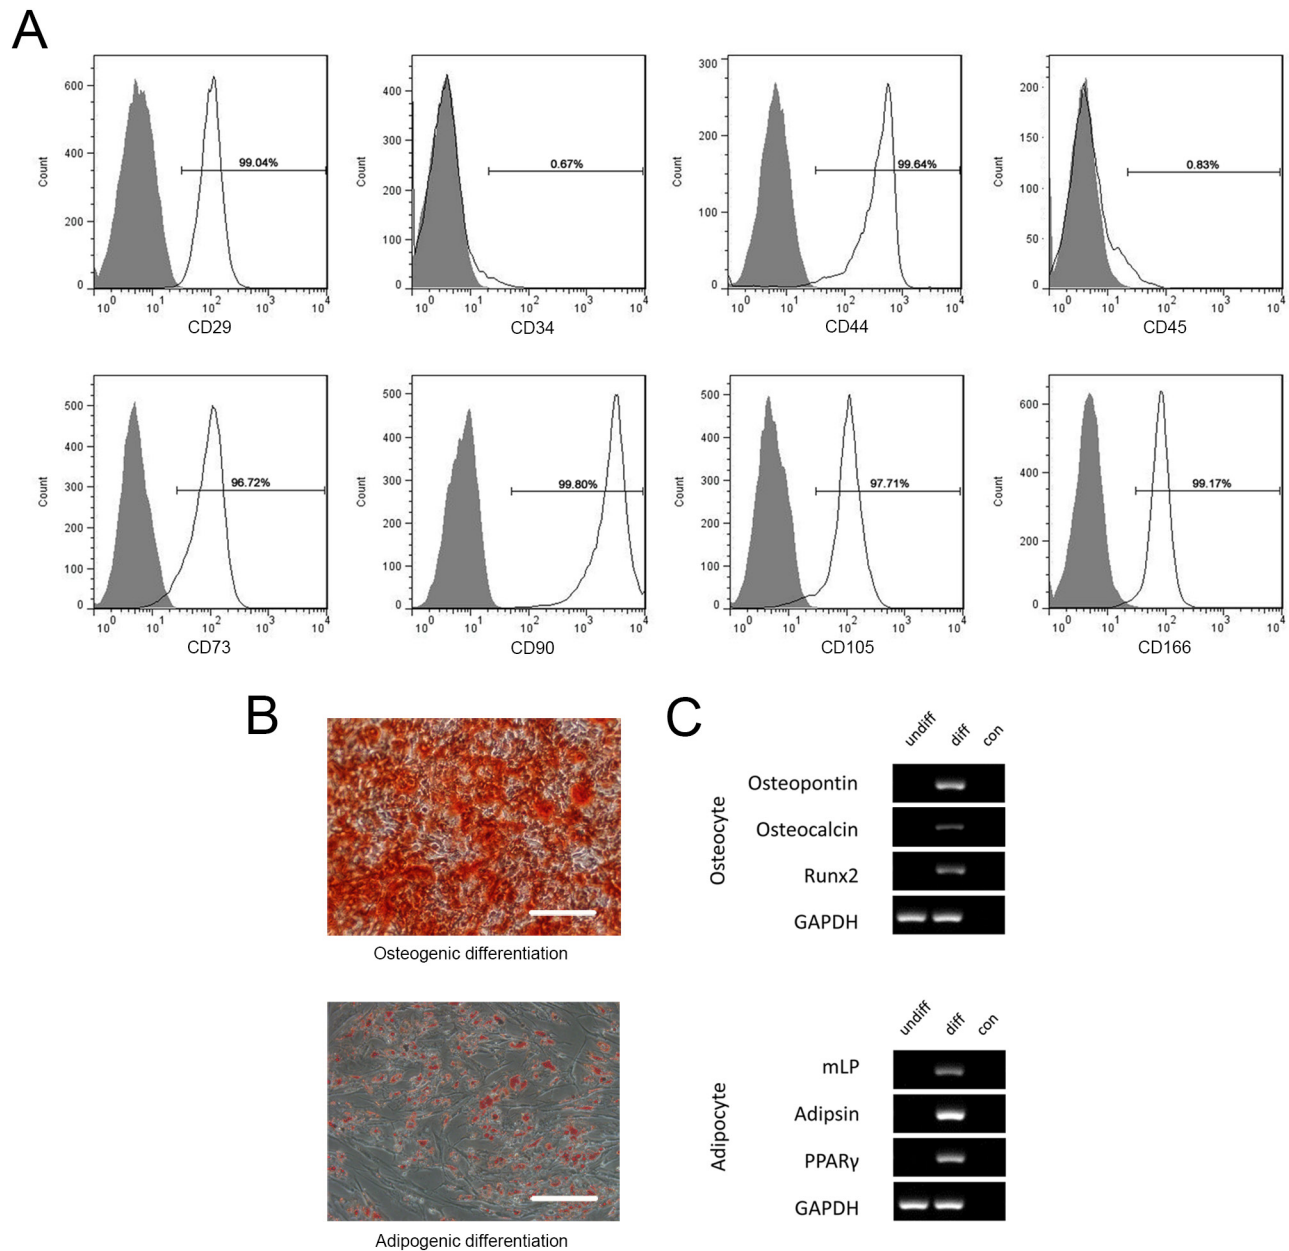

**Supplementary Figure S1: Characterization of shIL-8-MSCs.** **A.** CD29, CD34, CD44, CD45, CD73, CD105, and CD166 expression in shIL-8-MSCs were analyzed by flow cytometry, which showed that transduced cells maintained the phenotype of MSCs. **B.** MSCs were cultured in osteogenic medium for 2 weeks. Differentiation of MSCs into osteoblasts was confirmed by Alizarin Red S staining. Similarly, differentiation of MSCs into adipocytes was confirmed by Oil Red O staining, which showed lipid droplets in the cytoplasm of differentiated MSCs. Scale bar, 100  $\mu$ m. **C.** MSCs were cultured as shown in (B). Osteogenic and adipogenic markers were detected by PCR.

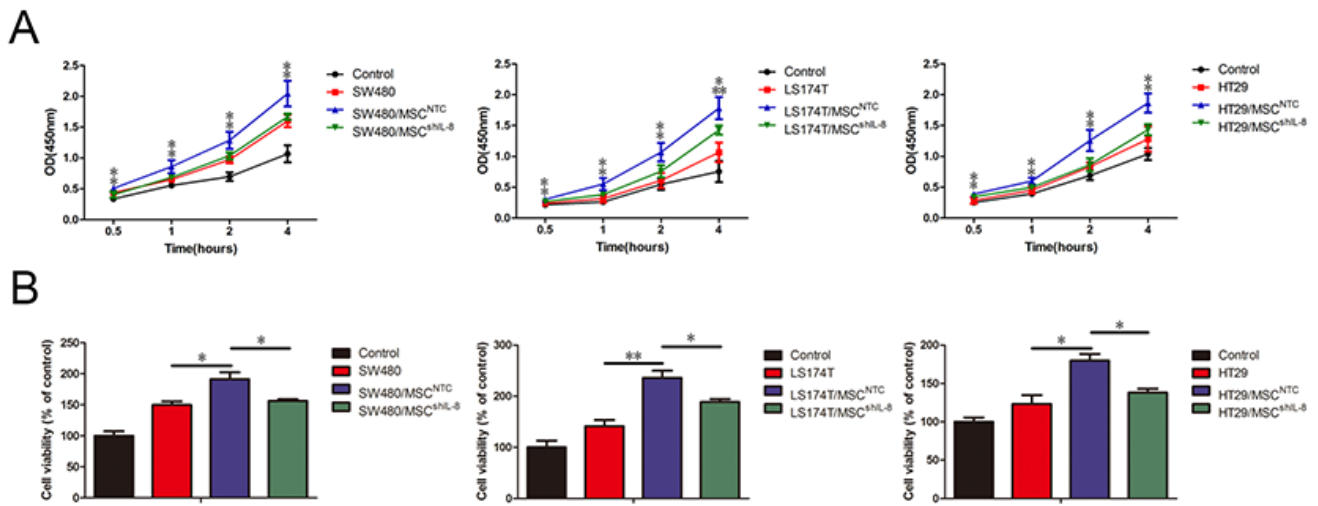

**Supplementary Figure S2: MSCs promote endothelial cell proliferation and migration through IL-8 secretion. A. & B.** HUVECs were cultured with conditional medium from CRC cells, CRC cell/MSC co-cultures, or CRC cell/shIL-8-MSC co-cultures. Cell viability was measured using CCK-8 assays, performed as described in Materials and Methods. The results are presented as the mean values from three independent experiments (\*,  $p < 0.05$ , \*\*,  $p < 0.01$ ).

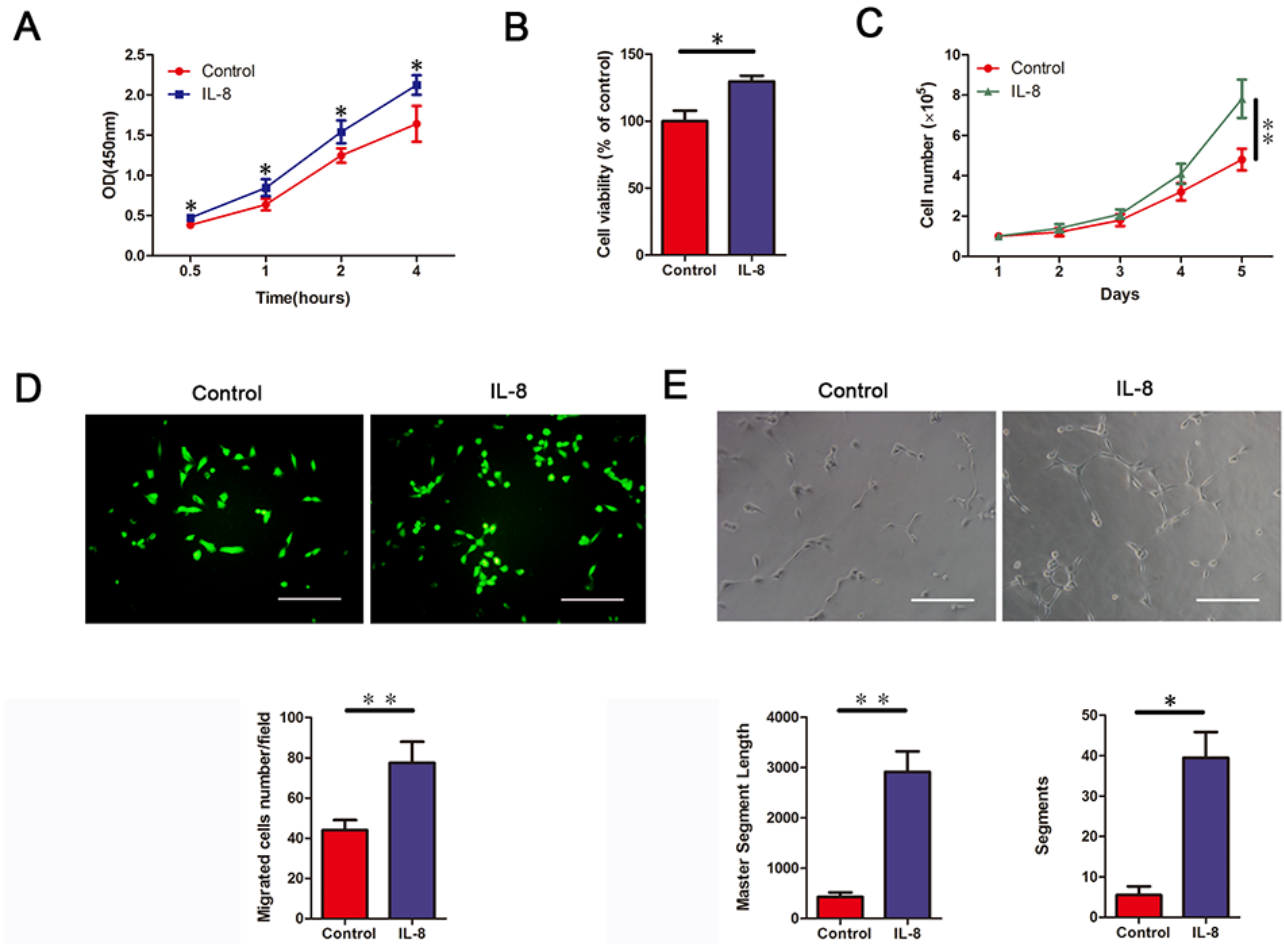

**Supplementary Figure S3: IL-8 promotes endothelial cell proliferation, migration and tube formation.** A. & B. IL-8 (100 ng/mL) was added to the culture medium of HUVECs. HUVEC viability was determined by CCK-8 assay. The results are presented as the mean values from three independent experiments (\*,  $p < 0.05$ ). C. The numbers of HUVECs following culture with medium alone or medium containing IL-8 (100 ng/mL) were determined. The counts of the cells are presented as the mean values from three independent experiments using a hemocytometer (\*\*,  $p < 0.01$ ). D. Assay of HUVEC migration. HUVECs that migrated through the transwell membrane were stained with Calcein AM. Scale bar, 100  $\mu\text{m}$ . Migrated HUVECs were counted. The counts of the cells are presented as the mean values per field from at least five randomly selected fields from three independent experiments (\*\*,  $p < 0.01$ ). E. HUVECs were stimulated by IL-8 (100 ng/mL) for 4 h. Images showed tube-formation ability of HUVECs before and after IL-8 stimulation. Scale bar, 100  $\mu\text{m}$ . Capillary-like structures were analyzed by the Angiogenesis Analyzer module in the Image J toolkit. The results are presented as the mean values per field from at least five randomly selected fields from three independent experiments (\*,  $p < 0.05$ , \*\*,  $p < 0.01$ ).

A

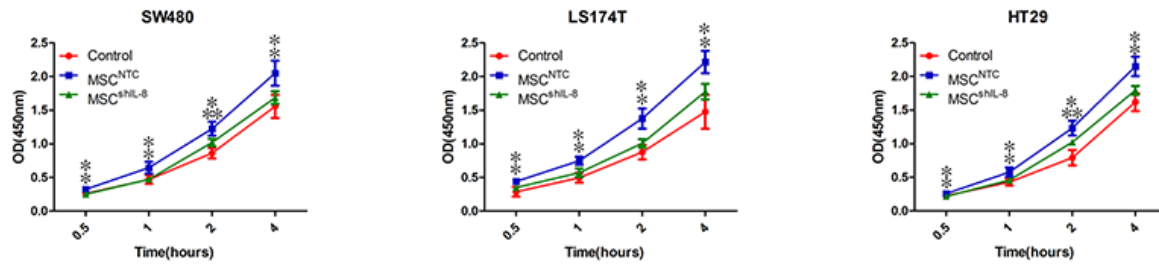

B

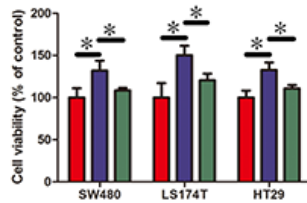

C

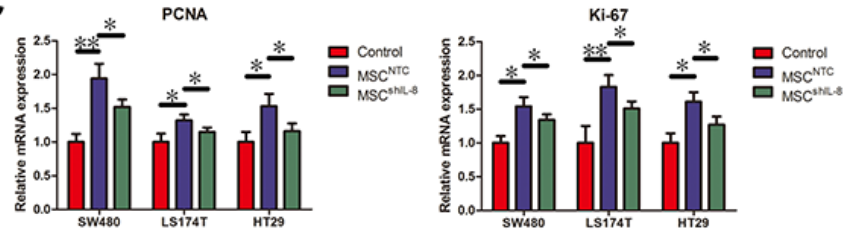

**Supplementary Figure S4: MSC-secreted IL-8 stimulates CRC cell proliferation.** A. & B. The viability of CRC cells (SW480, LS174T and HT29) cultured with fresh medium or conditioned medium from CRC cell/MSC co-cultures or CRC cell/shIL-8-MSC co-cultures was measured by CCK-8 assay. The results are presented as the mean values from three independent experiments (\*,  $p < 0.05$ , \*\*,  $p < 0.01$ ). C. CRC cells were cultured with fresh medium or conditioned medium from CRC cell/MSC co-cultures or CRC cell/shIL-8-MSC co-cultures. PCNA and Ki-67 mRNA levels was measured by qRT-PCR (\*,  $p < 0.05$ , \*\*,  $p < 0.01$ ).

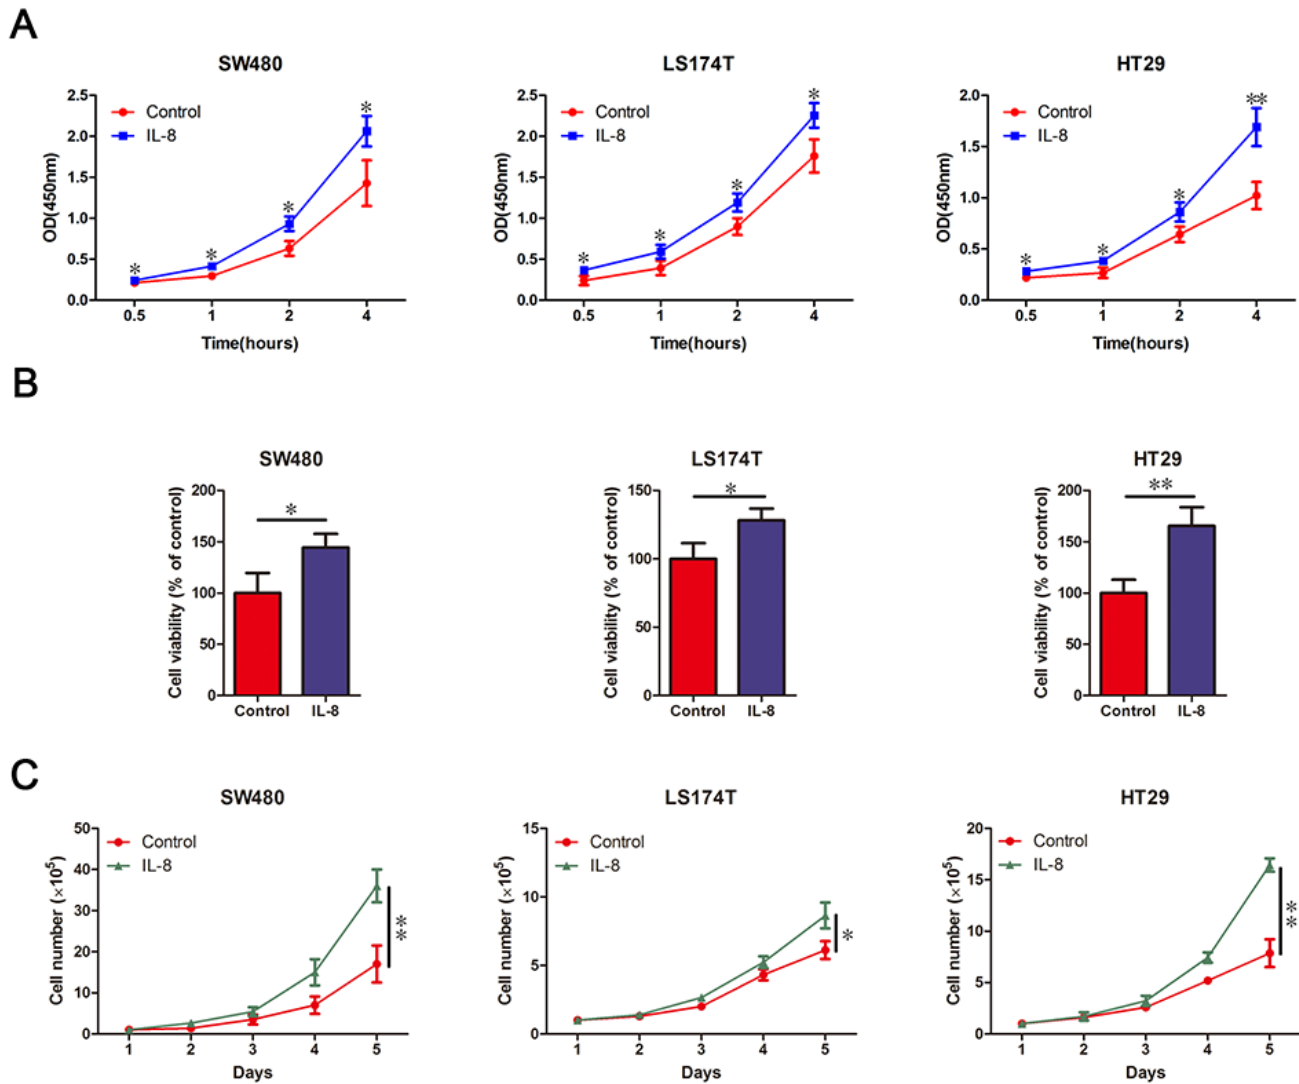

**Supplementary Figure S5: IL-8 induces CRC cell proliferation.** **A. & B.** The viability of CRC cells following stimulation with IL-8 (100 ng/mL) was determined by CCK-8 assay. The results are presented as the mean values from three independent experiments (\*,  $p < 0.05$ , \*\*,  $p < 0.01$ ). **C.** The numbers of CRC cells (SW480, LS174T and HT29) following stimulation with IL-8 (100 ng/mL) were counted. The counts of the cells are presented as the mean values from three independent experiments using a hemocytometer (\*,  $p < 0.05$ , \*\*,  $p < 0.01$ ).
